# Supplementary material for: Automated volumetry of meningiomas in contrast-enhanced T1-Weighted MRI using deep learning
Source: PubMed Central journal article supplement — World Neurosurg X. 2024 Feb 24;22:100353. doi: 10.1016/j.wnsx.2024.100353 (PMC10918322; doi:10.1016/j.wnsx.2024.100353), 2024-02-24
Supplement: mmc1.pdf [file mmc1.pdf]

# Entire dataset

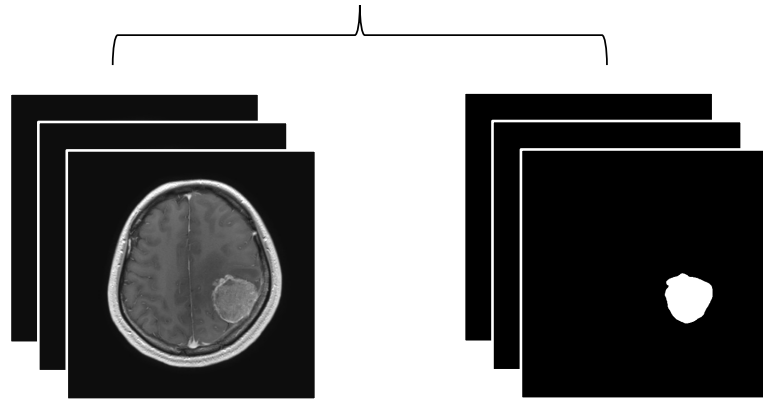

Legend:  
\*9: Train (light gray)  
\*1: Test (black)

10 fold cross validation

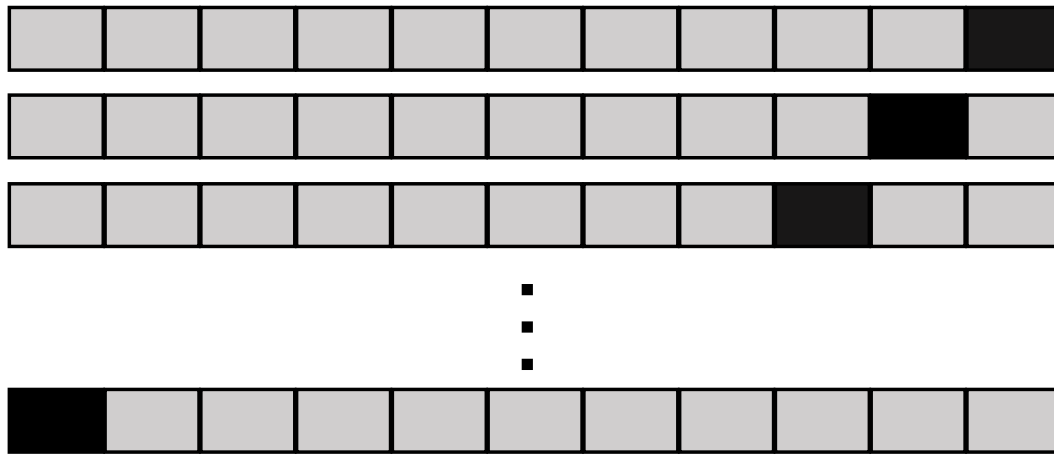

→ Dice index 1

→ Dice index 2

→ Dice index 3

⋮

→ Dice index 10

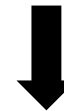

Dice index  
(Final result)
